# Supplementary material
Source: publisher figshare collection journal article supplement (https://acs.figshare.com/ndownloader/files/4681513)
Supplement: Supplementary file 1 [file 4681513]

 
data_bj448
 
_audit_creation_method            SHELXL-97
_chemical_name_systematic
;
 ?
;
_chemical_name_common             ?
_chemical_melting_point           ?
_chemical_formula_moiety          ?
_chemical_formula_sum
 'C35 H41 Cl O5 P3 Rh'
_chemical_formula_weight          772.95
 
loop_
 _atom_type_symbol
 _atom_type_description
 _atom_type_scat_dispersion_real
 _atom_type_scat_dispersion_imag
 _atom_type_scat_source
 'C'  'C'   0.0033   0.0016
 'International Tables Vol C Tables 4.2.6.8 and 6.1.1.4'
 'H'  'H'   0.0000   0.0000
 'International Tables Vol C Tables 4.2.6.8 and 6.1.1.4'
 'O'  'O'   0.0106   0.0060
 'International Tables Vol C Tables 4.2.6.8 and 6.1.1.4'
 'Cl'  'Cl'   0.1484   0.1585
 'International Tables Vol C Tables 4.2.6.8 and 6.1.1.4'
 'Rh'  'Rh'  -1.1178   0.9187
 'International Tables Vol C Tables 4.2.6.8 and 6.1.1.4'
 'P'  'P'   0.1023   0.0942
 'International Tables Vol C Tables 4.2.6.8 and 6.1.1.4'
 
_symmetry_cell_setting            triclinic
_symmetry_space_group_name_H-M    'P -1'
 
loop_
 _symmetry_equiv_pos_as_xyz
 'x, y, z'
 '-x, -y, -z'
 
_cell_length_a                    10.4723(11)
_cell_length_b                    11.6071(13)
_cell_length_c                    14.5877(15)
_cell_angle_alpha                 87.553(6)
_cell_angle_beta                  78.799(5)
_cell_angle_gamma                 83.749(5)
_cell_volume                      1728.6(3)
_cell_formula_units_Z             2
_cell_measurement_temperature     173(2)
_cell_measurement_reflns_used     5798
_cell_measurement_theta_min       2.24
_cell_measurement_theta_max       27.94
 
_exptl_crystal_description        plate
_exptl_crystal_colour             yellow
_exptl_crystal_size_max           0.25
_exptl_crystal_size_mid           0.25
_exptl_crystal_size_min           0.08
_exptl_crystal_density_meas       ?
_exptl_crystal_density_diffrn     1.485
_exptl_crystal_density_method     'not measured'
_exptl_crystal_F_000              796
_exptl_absorpt_coefficient_mu     0.751
_exptl_absorpt_correction_type    multi-scan
_exptl_absorpt_correction_T_min   0.770
_exptl_absorpt_correction_T_max   0.942
_exptl_absorpt_process_details    ?
 
_exptl_special_details
;
 ?
;
 
_diffrn_ambient_temperature       173(2)
_diffrn_radiation_wavelength      0.71073
_diffrn_radiation_type            MoK\a
_diffrn_radiation_source          'fine-focus sealed tube'
_diffrn_radiation_monochromator   graphite
_diffrn_measurement_device_type   'Bruker X8 APEX II'
_diffrn_measurement_method        'area detector'
_diffrn_detector_area_resol_mean  ?
_diffrn_standards_number          ?
_diffrn_standards_interval_count  ?
_diffrn_standards_interval_time   ?
_diffrn_standards_decay_%         ?
_diffrn_reflns_number             38784
_diffrn_reflns_av_R_equivalents   0.0395
_diffrn_reflns_av_sigmaI/netI     0.0438
_diffrn_reflns_limit_h_min        -13
_diffrn_reflns_limit_h_max        13
_diffrn_reflns_limit_k_min        -15
_diffrn_reflns_limit_k_max        15
_diffrn_reflns_limit_l_min        -19
_diffrn_reflns_limit_l_max        19
_diffrn_reflns_theta_min          1.77
_diffrn_reflns_theta_max          28.24
_reflns_number_total              8381
_reflns_number_gt                 6522
_reflns_threshold_expression      >2sigma(I)
 
_computing_data_collection        ?
_computing_cell_refinement        ?
_computing_data_reduction         ?
_computing_structure_solution     ?
_computing_structure_refinement   'SHELXL-97 (Sheldrick, 1997)'
_computing_molecular_graphics     ?
_computing_publication_material   ?
 
_refine_special_details
;
 Refinement of F^2^ against ALL reflections.  The weighted R-factor wR and
 goodness of fit S are based on F^2^, conventional R-factors R are based
 on F, with F set to zero for negative F^2^. The threshold expression of
 F^2^ > 2sigma(F^2^) is used only for calculating R-factors(gt) etc. and is
 not relevant to the choice of reflections for refinement.  R-factors based
 on F^2^ are statistically about twice as large as those based on F, and R-
 factors based on ALL data will be even larger.
;
 
_refine_ls_structure_factor_coef  Fsqd
_refine_ls_matrix_type            full
_refine_ls_weighting_scheme       calc
_refine_ls_weighting_details
 'calc w=1/[\s^2^(Fo^2^)+(0.0255P)^2^+0.9946P] where P=(Fo^2^+2Fc^2^)/3'
_atom_sites_solution_primary      direct
_atom_sites_solution_secondary    difmap
_atom_sites_solution_hydrogens    geom
_refine_ls_hydrogen_treatment     mixed
_refine_ls_extinction_method      none
_refine_ls_extinction_coef        ?
_refine_ls_number_reflns          8381
_refine_ls_number_parameters      424
_refine_ls_number_restraints      0
_refine_ls_R_factor_all           0.0513
_refine_ls_R_factor_gt            0.0318
_refine_ls_wR_factor_ref          0.0678
_refine_ls_wR_factor_gt           0.0614
_refine_ls_goodness_of_fit_ref    1.010
_refine_ls_restrained_S_all       1.010
_refine_ls_shift/su_max           0.010
_refine_ls_shift/su_mean          0.000
 
loop_
 _atom_site_label
 _atom_site_type_symbol
 _atom_site_fract_x
 _atom_site_fract_y
 _atom_site_fract_z
 _atom_site_U_iso_or_equiv
 _atom_site_adp_type
 _atom_site_occupancy
 _atom_site_symmetry_multiplicity
 _atom_site_calc_flag
 _atom_site_refinement_flags
 _atom_site_disorder_assembly
 _atom_site_disorder_group
C1 C 0.9244(2) 0.4769(2) 0.37679(17) 0.0298(5) Uani 1 1 d . . .
H1A H 0.8938 0.5515 0.3489 0.036 Uiso 1 1 calc R . .
H1B H 0.9365 0.4918 0.4407 0.036 Uiso 1 1 calc R . .
C2 C 0.6579(2) 0.4582(2) 0.45328(16) 0.0324(6) Uani 1 1 d . . .
H2A H 0.6234 0.5210 0.4138 0.039 Uiso 1 1 calc R . .
H2B H 0.5884 0.4062 0.4740 0.039 Uiso 1 1 calc R . .
C3 C 0.8474(3) 0.2587(2) 0.46169(16) 0.0302(6) Uani 1 1 d . . .
H3A H 0.9438 0.2486 0.4556 0.036 Uiso 1 1 calc R . .
H3B H 0.8080 0.2776 0.5274 0.036 Uiso 1 1 calc R . .
C4 C 0.9830(2) 0.07385(18) 0.29275(15) 0.0213(5) Uani 1 1 d . . .
C5 C 1.0633(2) 0.1089(2) 0.21241(16) 0.0266(5) Uani 1 1 d . . .
H5 H 1.0294 0.1652 0.1717 0.032 Uiso 1 1 calc R . .
C6 C 1.1930(2) 0.0631(2) 0.19023(17) 0.0315(6) Uani 1 1 d . . .
H6 H 1.2469 0.0867 0.1339 0.038 Uiso 1 1 calc R . .
C7 C 1.2439(2) -0.0162(2) 0.24940(17) 0.0308(6) Uani 1 1 d . . .
H7 H 1.3330 -0.0471 0.2345 0.037 Uiso 1 1 calc R . .
C8 C 1.1653(2) -0.0508(2) 0.33034(17) 0.0319(6) Uani 1 1 d . . .
H8 H 1.2005 -0.1053 0.3717 0.038 Uiso 1 1 calc R . .
C9 C 1.0360(2) -0.0068(2) 0.35179(16) 0.0272(5) Uani 1 1 d . . .
H9 H 0.9823 -0.0319 0.4076 0.033 Uiso 1 1 calc R . .
C10 C 0.7172(2) 0.01862(19) 0.33292(14) 0.0218(5) Uani 1 1 d . . .
C11 C 0.7639(2) -0.0898(2) 0.29795(15) 0.0274(5) Uani 1 1 d . . .
H11 H 0.8530 -0.1049 0.2682 0.033 Uiso 1 1 calc R . .
C12 C 0.6818(3) -0.1761(2) 0.30616(17) 0.0349(6) Uani 1 1 d . . .
H12 H 0.7137 -0.2500 0.2808 0.042 Uiso 1 1 calc R . .
C13 C 0.5535(3) -0.1554(2) 0.35105(18) 0.0381(6) Uani 1 1 d . . .
H13 H 0.4977 -0.2157 0.3580 0.046 Uiso 1 1 calc R . .
C14 C 0.5061(3) -0.0486(2) 0.38553(18) 0.0357(6) Uani 1 1 d . . .
H14 H 0.4173 -0.0345 0.4162 0.043 Uiso 1 1 calc R . .
C15 C 0.5870(2) 0.0390(2) 0.37581(16) 0.0295(5) Uani 1 1 d . . .
H15 H 0.5532 0.1138 0.3987 0.035 Uiso 1 1 calc R . .
C16 C 0.7095(2) 0.08040(18) 0.09976(14) 0.0188(4) Uani 1 1 d . . .
C17 C 0.8302(2) 0.01372(19) 0.07783(15) 0.0221(5) Uani 1 1 d . . .
H17 H 0.9086 0.0488 0.0755 0.027 Uiso 1 1 calc R . .
C18 C 0.8366(2) -0.1013(2) 0.05971(15) 0.0266(5) Uani 1 1 d . . .
H18 H 0.9193 -0.1456 0.0442 0.032 Uiso 1 1 calc R . .
C19 C 0.7240(3) -0.1533(2) 0.06379(17) 0.0314(6) Uani 1 1 d . . .
H19 H 0.7288 -0.2337 0.0518 0.038 Uiso 1 1 calc R . .
C20 C 0.6045(3) -0.0891(2) 0.08521(18) 0.0337(6) Uani 1 1 d . . .
H20 H 0.5266 -0.1251 0.0878 0.040 Uiso 1 1 calc R . .
C21 C 0.5971(2) 0.0275(2) 0.10296(16) 0.0260(5) Uani 1 1 d . . .
H21 H 0.5141 0.0715 0.1174 0.031 Uiso 1 1 calc R . .
C22 C 0.8173(2) 0.27486(18) 0.01367(14) 0.0189(4) Uani 1 1 d . . .
C23 C 0.9136(2) 0.34590(18) 0.01788(16) 0.0238(5) Uani 1 1 d . . .
H23 H 0.9220 0.3740 0.0764 0.029 Uiso 1 1 calc R . .
C24 C 0.9976(2) 0.37615(19) -0.06268(17) 0.0301(6) Uani 1 1 d . . .
H24 H 1.0636 0.4251 -0.0595 0.036 Uiso 1 1 calc R . .
C25 C 0.9858(3) 0.3357(2) -0.14685(17) 0.0337(6) Uani 1 1 d . . .
H25 H 1.0426 0.3581 -0.2022 0.040 Uiso 1 1 calc R . .
C26 C 0.8928(2) 0.2632(2) -0.15228(16) 0.0324(6) Uani 1 1 d . . .
H26 H 0.8864 0.2341 -0.2109 0.039 Uiso 1 1 calc R . .
C27 C 0.8086(2) 0.2326(2) -0.07218(15) 0.0259(5) Uani 1 1 d . . .
H27 H 0.7442 0.1822 -0.0758 0.031 Uiso 1 1 calc R . .
C28 C 0.5459(2) 0.29399(18) 0.11296(15) 0.0193(4) Uani 1 1 d . . .
C29 C 0.4511(2) 0.2878(2) 0.19283(17) 0.0349(6) Uani 1 1 d . . .
H29 H 0.4743 0.2531 0.2483 0.042 Uiso 1 1 calc R . .
C30 C 0.3233(3) 0.3313(2) 0.1931(2) 0.0425(7) Uani 1 1 d . . .
H30 H 0.2588 0.3245 0.2482 0.051 Uiso 1 1 calc R . .
C31 C 0.2886(3) 0.3842(2) 0.1146(2) 0.0378(6) Uani 1 1 d . . .
H31 H 0.2005 0.4150 0.1153 0.045 Uiso 1 1 calc R . .
C32 C 0.3813(2) 0.3926(2) 0.03546(18) 0.0319(6) Uani 1 1 d . . .
H32 H 0.3579 0.4300 -0.0190 0.038 Uiso 1 1 calc R . .
C33 C 0.5100(2) 0.34657(19) 0.03418(16) 0.0248(5) Uani 1 1 d . . .
H33 H 0.5736 0.3515 -0.0216 0.030 Uiso 1 1 calc R . .
C34 C 0.7549(3) 0.7947(3) 0.5553(2) 0.0537(8) Uani 1 1 d . . .
H34A H 0.6810 0.7950 0.6081 0.080 Uiso 1 1 calc R . .
H34B H 0.7221 0.8129 0.4973 0.080 Uiso 1 1 calc R . .
H34C H 0.8119 0.8531 0.5647 0.080 Uiso 1 1 calc R . .
C35 C 0.6318(3) 0.3715(3) 0.7514(2) 0.0568(9) Uani 1 1 d . . .
H35A H 0.6230 0.4269 0.8017 0.085 Uiso 1 1 calc R . .
H35B H 0.7240 0.3576 0.7211 0.085 Uiso 1 1 calc R . .
H35C H 0.6003 0.2984 0.7776 0.085 Uiso 1 1 calc R . .
O1 O 1.0442(2) 0.4338(2) 0.32350(15) 0.0541(6) Uani 1 1 d . . .
O2 O 0.68824(19) 0.50718(17) 0.53263(13) 0.0397(5) Uani 1 1 d . . .
O3 O 0.80273(15) 0.15501(13) 0.43721(10) 0.0251(4) Uani 1 1 d . . .
O4 O 0.8262(2) 0.68494(19) 0.54930(16) 0.0538(6) Uani 1 1 d . . .
O5 O 0.5572(2) 0.41721(17) 0.68517(13) 0.0388(5) Uani 1 1 d . . .
Cl1 Cl 0.71189(6) 0.49471(5) 0.20035(4) 0.02595(13) Uani 1 1 d . . .
Rh1 Rh 0.763634(17) 0.300113(14) 0.255313(11) 0.01759(5) Uani 1 1 d . . .
P1 P 0.80000(6) 0.37632(5) 0.38353(4) 0.02132(13) Uani 1 1 d . . .
P2 P 0.81506(6) 0.13893(5) 0.32376(4) 0.01988(12) Uani 1 1 d . . .
P3 P 0.71096(5) 0.23311(5) 0.12111(4) 0.01679(12) Uani 1 1 d . . .
H1O H 1.083(4) 0.378(4) 0.371(3) 0.120(17) Uiso 1 1 d . . .
H2O H 0.645(4) 0.477(3) 0.587(3) 0.101(14) Uiso 1 1 d . . .
H4O H 0.769(3) 0.631(3) 0.546(2) 0.075(12) Uiso 1 1 d . . .
H5O H 0.490(3) 0.446(3) 0.711(2) 0.065(12) Uiso 1 1 d . . .
 
loop_
 _atom_site_aniso_label
 _atom_site_aniso_U_11
 _atom_site_aniso_U_22
 _atom_site_aniso_U_33
 _atom_site_aniso_U_23
 _atom_site_aniso_U_13
 _atom_site_aniso_U_12
C1 0.0259(13) 0.0341(14) 0.0291(13) -0.0033(10) -0.0036(10) -0.0038(11)
C2 0.0282(14) 0.0430(15) 0.0260(13) -0.0115(11) -0.0041(10) -0.0012(11)
C3 0.0425(15) 0.0285(13) 0.0230(12) 0.0029(10) -0.0135(11) -0.0068(11)
C4 0.0227(12) 0.0203(11) 0.0222(11) -0.0003(9) -0.0073(9) -0.0021(9)
C5 0.0252(13) 0.0302(13) 0.0246(12) 0.0069(10) -0.0071(10) -0.0025(10)
C6 0.0224(13) 0.0426(15) 0.0286(13) 0.0049(11) -0.0022(10) -0.0070(11)
C7 0.0218(13) 0.0347(14) 0.0355(14) -0.0023(11) -0.0072(11) 0.0029(10)
C8 0.0320(14) 0.0295(13) 0.0354(14) 0.0066(11) -0.0143(11) 0.0023(11)
C9 0.0293(13) 0.0259(12) 0.0255(12) 0.0058(10) -0.0036(10) -0.0038(10)
C10 0.0241(12) 0.0252(12) 0.0168(10) 0.0047(9) -0.0055(9) -0.0043(9)
C11 0.0293(13) 0.0300(13) 0.0231(12) 0.0013(10) -0.0054(10) -0.0039(10)
C12 0.0473(17) 0.0284(14) 0.0316(14) 0.0000(11) -0.0102(12) -0.0108(12)
C13 0.0462(17) 0.0400(16) 0.0343(14) 0.0080(12) -0.0140(13) -0.0235(13)
C14 0.0266(14) 0.0491(17) 0.0327(14) 0.0019(12) -0.0049(11) -0.0124(12)
C15 0.0270(13) 0.0347(14) 0.0264(12) 0.0003(10) -0.0036(10) -0.0049(11)
C16 0.0222(12) 0.0191(11) 0.0152(10) 0.0011(8) -0.0034(9) -0.0028(9)
C17 0.0207(12) 0.0224(12) 0.0236(11) 0.0011(9) -0.0049(9) -0.0036(9)
C18 0.0296(13) 0.0231(12) 0.0250(12) -0.0012(9) -0.0018(10) 0.0017(10)
C19 0.0462(16) 0.0183(12) 0.0320(13) -0.0035(10) -0.0110(12) -0.0054(11)
C20 0.0332(15) 0.0288(13) 0.0431(15) -0.0011(11) -0.0116(12) -0.0136(11)
C21 0.0225(12) 0.0257(12) 0.0305(13) -0.0001(10) -0.0053(10) -0.0050(10)
C22 0.0189(11) 0.0170(11) 0.0190(11) 0.0021(8) -0.0010(9) 0.0008(9)
C23 0.0287(13) 0.0150(11) 0.0247(12) -0.0031(9) 0.0015(10) -0.0001(9)
C24 0.0294(14) 0.0168(11) 0.0383(14) 0.0011(10) 0.0079(11) -0.0033(10)
C25 0.0377(15) 0.0278(13) 0.0270(13) 0.0095(10) 0.0097(11) 0.0025(11)
C26 0.0341(15) 0.0431(15) 0.0165(11) 0.0005(10) -0.0021(10) 0.0063(12)
C27 0.0264(13) 0.0297(13) 0.0209(11) -0.0014(9) -0.0042(10) -0.0006(10)
C28 0.0180(11) 0.0178(11) 0.0222(11) -0.0020(9) -0.0038(9) -0.0021(9)
C29 0.0292(14) 0.0431(16) 0.0284(13) 0.0048(11) -0.0027(11) 0.0059(12)
C30 0.0247(14) 0.0534(18) 0.0425(16) -0.0018(13) 0.0046(12) 0.0069(12)
C31 0.0236(14) 0.0327(14) 0.0587(18) -0.0079(13) -0.0148(13) 0.0053(11)
C32 0.0366(15) 0.0240(13) 0.0403(15) 0.0010(11) -0.0225(12) -0.0003(11)
C33 0.0267(13) 0.0231(12) 0.0267(12) 0.0002(9) -0.0099(10) -0.0035(10)
C34 0.057(2) 0.0464(19) 0.057(2) -0.0072(15) -0.0174(16) 0.0073(15)
C35 0.066(2) 0.058(2) 0.0490(18) -0.0015(15) -0.0306(17) 0.0152(17)
O1 0.0325(11) 0.0759(16) 0.0484(13) -0.0095(11) 0.0087(10) -0.0072(11)
O2 0.0424(11) 0.0509(12) 0.0261(10) -0.0165(9) 0.0008(8) -0.0134(9)
O3 0.0336(9) 0.0254(8) 0.0171(8) 0.0033(6) -0.0062(7) -0.0052(7)
O4 0.0367(12) 0.0454(13) 0.0821(16) -0.0226(11) -0.0171(11) 0.0024(10)
O5 0.0359(12) 0.0496(12) 0.0287(10) 0.0016(9) -0.0074(9) 0.0062(9)
Cl1 0.0324(3) 0.0199(3) 0.0241(3) 0.0012(2) -0.0042(2) 0.0010(2)
Rh1 0.02020(10) 0.01813(9) 0.01418(8) 0.00014(6) -0.00340(6) -0.00080(7)
P1 0.0240(3) 0.0237(3) 0.0166(3) -0.0020(2) -0.0042(2) -0.0024(2)
P2 0.0217(3) 0.0212(3) 0.0164(3) 0.0020(2) -0.0032(2) -0.0022(2)
P3 0.0184(3) 0.0167(3) 0.0150(3) 0.0008(2) -0.0027(2) -0.0021(2)
 
_geom_special_details
;
 All esds (except the esd in the dihedral angle between two l.s. planes)
 are estimated using the full covariance matrix.  The cell esds are taken
 into account individually in the estimation of esds in distances, angles
 and torsion angles; correlations between esds in cell parameters are only
 used when they are defined by crystal symmetry.  An approximate (isotropic)
 treatment of cell esds is used for estimating esds involving l.s. planes.
;
 
loop_
 _geom_bond_atom_site_label_1
 _geom_bond_atom_site_label_2
 _geom_bond_distance
 _geom_bond_site_symmetry_2
 _geom_bond_publ_flag
C1 O1 1.395(3) . ?
C1 P1 1.828(2) . ?
C1 H1A 0.9900 . ?
C1 H1B 0.9900 . ?
C2 O2 1.415(3) . ?
C2 P1 1.828(2) . ?
C2 H2A 0.9900 . ?
C2 H2B 0.9900 . ?
C3 O3 1.421(3) . ?
C3 P1 1.830(2) . ?
C3 H3A 0.9900 . ?
C3 H3B 0.9900 . ?
C4 C5 1.378(3) . ?
C4 C9 1.390(3) . ?
C4 P2 1.816(2) . ?
C5 C6 1.385(3) . ?
C5 H5 0.9500 . ?
C6 C7 1.371(3) . ?
C6 H6 0.9500 . ?
C7 C8 1.373(3) . ?
C7 H7 0.9500 . ?
C8 C9 1.375(3) . ?
C8 H8 0.9500 . ?
C9 H9 0.9500 . ?
C10 C11 1.381(3) . ?
C10 C15 1.385(3) . ?
C10 P2 1.806(2) . ?
C11 C12 1.376(3) . ?
C11 H11 0.9500 . ?
C12 C13 1.376(4) . ?
C12 H12 0.9500 . ?
C13 C14 1.363(4) . ?
C13 H13 0.9500 . ?
C14 C15 1.378(3) . ?
C14 H14 0.9500 . ?
C15 H15 0.9500 . ?
C16 C21 1.378(3) . ?
C16 C17 1.396(3) . ?
C16 P3 1.815(2) . ?
C17 C18 1.364(3) . ?
C17 H17 0.9500 . ?
C18 C19 1.372(3) . ?
C18 H18 0.9500 . ?
C19 C20 1.373(3) . ?
C19 H19 0.9500 . ?
C20 C21 1.380(3) . ?
C20 H20 0.9500 . ?
C21 H21 0.9500 . ?
C22 C23 1.382(3) . ?
C22 C27 1.387(3) . ?
C22 P3 1.818(2) . ?
C23 C24 1.382(3) . ?
C23 H23 0.9500 . ?
C24 C25 1.365(3) . ?
C24 H24 0.9500 . ?
C25 C26 1.370(4) . ?
C25 H25 0.9500 . ?
C26 C27 1.379(3) . ?
C26 H26 0.9500 . ?
C27 H27 0.9500 . ?
C28 C33 1.376(3) . ?
C28 C29 1.381(3) . ?
C28 P3 1.819(2) . ?
C29 C30 1.377(3) . ?
C29 H29 0.9500 . ?
C30 C31 1.369(4) . ?
C30 H30 0.9500 . ?
C31 C32 1.364(4) . ?
C31 H31 0.9500 . ?
C32 C33 1.391(3) . ?
C32 H32 0.9500 . ?
C33 H33 0.9500 . ?
C34 O4 1.402(3) . ?
C34 H34A 0.9800 . ?
C34 H34B 0.9800 . ?
C34 H34C 0.9800 . ?
C35 O5 1.408(3) . ?
C35 H35A 0.9800 . ?
C35 H35B 0.9800 . ?
C35 H35C 0.9800 . ?
O1 H1O 1.04(4) . ?
O2 H2O 0.92(4) . ?
O3 P2 1.6518(15) . ?
O4 H4O 0.92(4) . ?
O5 H5O 0.77(3) . ?
Cl1 Rh1 2.4054(6) . ?
Rh1 P2 2.1487(6) . ?
Rh1 P1 2.2174(6) . ?
Rh1 P3 2.3205(6) . ?
 
loop_
 _geom_angle_atom_site_label_1
 _geom_angle_atom_site_label_2
 _geom_angle_atom_site_label_3
 _geom_angle
 _geom_angle_site_symmetry_1
 _geom_angle_site_symmetry_3
 _geom_angle_publ_flag
O1 C1 P1 112.09(17) . . ?
O1 C1 H1A 109.2 . . ?
P1 C1 H1A 109.2 . . ?
O1 C1 H1B 109.2 . . ?
P1 C1 H1B 109.2 . . ?
H1A C1 H1B 107.9 . . ?
O2 C2 P1 112.40(17) . . ?
O2 C2 H2A 109.1 . . ?
P1 C2 H2A 109.1 . . ?
O2 C2 H2B 109.1 . . ?
P1 C2 H2B 109.1 . . ?
H2A C2 H2B 107.9 . . ?
O3 C3 P1 108.66(15) . . ?
O3 C3 H3A 110.0 . . ?
P1 C3 H3A 110.0 . . ?
O3 C3 H3B 110.0 . . ?
P1 C3 H3B 110.0 . . ?
H3A C3 H3B 108.3 . . ?
C5 C4 C9 118.3(2) . . ?
C5 C4 P2 120.42(17) . . ?
C9 C4 P2 121.14(17) . . ?
C4 C5 C6 120.8(2) . . ?
C4 C5 H5 119.6 . . ?
C6 C5 H5 119.6 . . ?
C7 C6 C5 120.1(2) . . ?
C7 C6 H6 119.9 . . ?
C5 C6 H6 119.9 . . ?
C6 C7 C8 119.7(2) . . ?
C6 C7 H7 120.2 . . ?
C8 C7 H7 120.2 . . ?
C7 C8 C9 120.3(2) . . ?
C7 C8 H8 119.9 . . ?
C9 C8 H8 119.9 . . ?
C8 C9 C4 120.8(2) . . ?
C8 C9 H9 119.6 . . ?
C4 C9 H9 119.6 . . ?
C11 C10 C15 119.0(2) . . ?
C11 C10 P2 123.92(18) . . ?
C15 C10 P2 117.02(17) . . ?
C12 C11 C10 120.1(2) . . ?
C12 C11 H11 119.9 . . ?
C10 C11 H11 119.9 . . ?
C13 C12 C11 120.1(2) . . ?
C13 C12 H12 119.9 . . ?
C11 C12 H12 119.9 . . ?
C14 C13 C12 120.3(2) . . ?
C14 C13 H13 119.9 . . ?
C12 C13 H13 119.9 . . ?
C13 C14 C15 119.9(3) . . ?
C13 C14 H14 120.0 . . ?
C15 C14 H14 120.0 . . ?
C14 C15 C10 120.4(2) . . ?
C14 C15 H15 119.8 . . ?
C10 C15 H15 119.8 . . ?
C21 C16 C17 118.6(2) . . ?
C21 C16 P3 123.92(17) . . ?
C17 C16 P3 117.48(16) . . ?
C18 C17 C16 120.7(2) . . ?
C18 C17 H17 119.7 . . ?
C16 C17 H17 119.7 . . ?
C17 C18 C19 120.3(2) . . ?
C17 C18 H18 119.9 . . ?
C19 C18 H18 119.9 . . ?
C18 C19 C20 119.9(2) . . ?
C18 C19 H19 120.1 . . ?
C20 C19 H19 120.1 . . ?
C19 C20 C21 120.3(2) . . ?
C19 C20 H20 119.9 . . ?
C21 C20 H20 119.9 . . ?
C16 C21 C20 120.3(2) . . ?
C16 C21 H21 119.8 . . ?
C20 C21 H21 119.8 . . ?
C23 C22 C27 118.9(2) . . ?
C23 C22 P3 119.35(16) . . ?
C27 C22 P3 121.66(17) . . ?
C24 C23 C22 120.3(2) . . ?
C24 C23 H23 119.9 . . ?
C22 C23 H23 119.9 . . ?
C25 C24 C23 120.0(2) . . ?
C25 C24 H24 120.0 . . ?
C23 C24 H24 120.0 . . ?
C24 C25 C26 120.6(2) . . ?
C24 C25 H25 119.7 . . ?
C26 C25 H25 119.7 . . ?
C25 C26 C27 119.7(2) . . ?
C25 C26 H26 120.2 . . ?
C27 C26 H26 120.2 . . ?
C26 C27 C22 120.5(2) . . ?
C26 C27 H27 119.8 . . ?
C22 C27 H27 119.8 . . ?
C33 C28 C29 118.4(2) . . ?
C33 C28 P3 124.88(17) . . ?
C29 C28 P3 116.76(17) . . ?
C30 C29 C28 120.8(2) . . ?
C30 C29 H29 119.6 . . ?
C28 C29 H29 119.6 . . ?
C31 C30 C29 120.4(2) . . ?
C31 C30 H30 119.8 . . ?
C29 C30 H30 119.8 . . ?
C32 C31 C30 119.5(2) . . ?
C32 C31 H31 120.2 . . ?
C30 C31 H31 120.2 . . ?
C31 C32 C33 120.3(2) . . ?
C31 C32 H32 119.9 . . ?
C33 C32 H32 119.9 . . ?
C28 C33 C32 120.6(2) . . ?
C28 C33 H33 119.7 . . ?
C32 C33 H33 119.7 . . ?
O4 C34 H34A 109.5 . . ?
O4 C34 H34B 109.5 . . ?
H34A C34 H34B 109.5 . . ?
O4 C34 H34C 109.5 . . ?
H34A C34 H34C 109.5 . . ?
H34B C34 H34C 109.5 . . ?
O5 C35 H35A 109.5 . . ?
O5 C35 H35B 109.5 . . ?
H35A C35 H35B 109.5 . . ?
O5 C35 H35C 109.5 . . ?
H35A C35 H35C 109.5 . . ?
H35B C35 H35C 109.5 . . ?
C1 O1 H1O 102(2) . . ?
C2 O2 H2O 112(2) . . ?
C3 O3 P2 114.60(13) . . ?
C34 O4 H4O 108(2) . . ?
C35 O5 H5O 110(3) . . ?
P2 Rh1 P1 83.37(2) . . ?
P2 Rh1 P3 100.62(2) . . ?
P1 Rh1 P3 175.04(2) . . ?
P2 Rh1 Cl1 170.93(2) . . ?
P1 Rh1 Cl1 87.56(2) . . ?
P3 Rh1 Cl1 88.44(2) . . ?
C2 P1 C1 101.25(11) . . ?
C2 P1 C3 104.69(12) . . ?
C1 P1 C3 104.66(12) . . ?
C2 P1 Rh1 115.15(8) . . ?
C1 P1 Rh1 120.78(8) . . ?
C3 P1 Rh1 108.75(8) . . ?
O3 P2 C10 96.52(9) . . ?
O3 P2 C4 100.58(9) . . ?
C10 P2 C4 104.70(10) . . ?
O3 P2 Rh1 111.39(6) . . ?
C10 P2 Rh1 122.17(8) . . ?
C4 P2 Rh1 117.53(7) . . ?
C16 P3 C22 99.66(9) . . ?
C16 P3 C28 103.18(10) . . ?
C22 P3 C28 106.71(10) . . ?
C16 P3 Rh1 123.13(7) . . ?
C22 P3 Rh1 113.91(7) . . ?
C28 P3 Rh1 108.73(7) . . ?
 
loop_
 _geom_torsion_atom_site_label_1
 _geom_torsion_atom_site_label_2
 _geom_torsion_atom_site_label_3
 _geom_torsion_atom_site_label_4
 _geom_torsion
 _geom_torsion_site_symmetry_1
 _geom_torsion_site_symmetry_2
 _geom_torsion_site_symmetry_3
 _geom_torsion_site_symmetry_4
 _geom_torsion_publ_flag
C9 C4 C5 C6 1.2(3) . . . . ?
P2 C4 C5 C6 177.34(19) . . . . ?
C4 C5 C6 C7 -1.4(4) . . . . ?
C5 C6 C7 C8 0.6(4) . . . . ?
C6 C7 C8 C9 0.5(4) . . . . ?
C7 C8 C9 C4 -0.7(4) . . . . ?
C5 C4 C9 C8 -0.2(3) . . . . ?
P2 C4 C9 C8 -176.28(18) . . . . ?
C15 C10 C11 C12 -0.2(3) . . . . ?
P2 C10 C11 C12 -178.56(18) . . . . ?
C10 C11 C12 C13 -1.4(4) . . . . ?
C11 C12 C13 C14 1.7(4) . . . . ?
C12 C13 C14 C15 -0.3(4) . . . . ?
C13 C14 C15 C10 -1.4(4) . . . . ?
C11 C10 C15 C14 1.6(3) . . . . ?
P2 C10 C15 C14 -179.92(19) . . . . ?
C21 C16 C17 C18 0.2(3) . . . . ?
P3 C16 C17 C18 -179.12(17) . . . . ?
C16 C17 C18 C19 -0.7(3) . . . . ?
C17 C18 C19 C20 0.7(4) . . . . ?
C18 C19 C20 C21 -0.2(4) . . . . ?
C17 C16 C21 C20 0.3(3) . . . . ?
P3 C16 C21 C20 179.56(18) . . . . ?
C19 C20 C21 C16 -0.3(4) . . . . ?
C27 C22 C23 C24 1.5(3) . . . . ?
P3 C22 C23 C24 178.29(17) . . . . ?
C22 C23 C24 C25 -0.1(3) . . . . ?
C23 C24 C25 C26 -1.3(4) . . . . ?
C24 C25 C26 C27 1.3(4) . . . . ?
C25 C26 C27 C22 0.1(4) . . . . ?
C23 C22 C27 C26 -1.5(3) . . . . ?
P3 C22 C27 C26 -178.22(18) . . . . ?
C33 C28 C29 C30 1.1(4) . . . . ?
P3 C28 C29 C30 -179.8(2) . . . . ?
C28 C29 C30 C31 -1.7(4) . . . . ?
C29 C30 C31 C32 0.7(4) . . . . ?
C30 C31 C32 C33 0.7(4) . . . . ?
C29 C28 C33 C32 0.3(3) . . . . ?
P3 C28 C33 C32 -178.74(17) . . . . ?
C31 C32 C33 C28 -1.2(4) . . . . ?
P1 C3 O3 P2 38.3(2) . . . . ?
O2 C2 P1 C1 -46.3(2) . . . . ?
O2 C2 P1 C3 62.3(2) . . . . ?
O2 C2 P1 Rh1 -178.39(15) . . . . ?
O1 C1 P1 C2 -178.46(19) . . . . ?
O1 C1 P1 C3 72.9(2) . . . . ?
O1 C1 P1 Rh1 -49.9(2) . . . . ?
O3 C3 P1 C2 102.37(17) . . . . ?
O3 C3 P1 C1 -151.55(16) . . . . ?
O3 C3 P1 Rh1 -21.20(18) . . . . ?
P2 Rh1 P1 C2 -117.32(10) . . . . ?
P3 Rh1 P1 C2 26.3(3) . . . . ?
Cl1 Rh1 P1 C2 62.65(10) . . . . ?
P2 Rh1 P1 C1 120.64(10) . . . . ?
P3 Rh1 P1 C1 -95.7(3) . . . . ?
Cl1 Rh1 P1 C1 -59.38(10) . . . . ?
P2 Rh1 P1 C3 -0.24(9) . . . . ?
P3 Rh1 P1 C3 143.4(3) . . . . ?
Cl1 Rh1 P1 C3 179.73(9) . . . . ?
C3 O3 P2 C10 -168.32(17) . . . . ?
C3 O3 P2 C4 85.35(17) . . . . ?
C3 O3 P2 Rh1 -39.98(17) . . . . ?
C11 C10 P2 O3 -118.34(19) . . . . ?
C15 C10 P2 O3 63.29(18) . . . . ?
C11 C10 P2 C4 -15.6(2) . . . . ?
C15 C10 P2 C4 166.06(17) . . . . ?
C11 C10 P2 Rh1 121.28(18) . . . . ?
C15 C10 P2 Rh1 -57.09(19) . . . . ?
C5 C4 P2 O3 -137.84(19) . . . . ?
C9 C4 P2 O3 38.2(2) . . . . ?
C5 C4 P2 C10 122.46(19) . . . . ?
C9 C4 P2 C10 -61.5(2) . . . . ?
C5 C4 P2 Rh1 -16.8(2) . . . . ?
C9 C4 P2 Rh1 159.20(16) . . . . ?
P1 Rh1 P2 O3 18.88(7) . . . . ?
P3 Rh1 P2 O3 -158.13(6) . . . . ?
Cl1 Rh1 P2 O3 18.72(17) . . . . ?
P1 Rh1 P2 C10 131.87(9) . . . . ?
P3 Rh1 P2 C10 -45.14(9) . . . . ?
Cl1 Rh1 P2 C10 131.71(15) . . . . ?
P1 Rh1 P2 C4 -96.37(8) . . . . ?
P3 Rh1 P2 C4 86.62(8) . . . . ?
Cl1 Rh1 P2 C4 -96.53(16) . . . . ?
C21 C16 P3 C22 -124.90(19) . . . . ?
C17 C16 P3 C22 54.35(18) . . . . ?
C21 C16 P3 C28 -15.1(2) . . . . ?
C17 C16 P3 C28 164.19(16) . . . . ?
C21 C16 P3 Rh1 108.08(18) . . . . ?
C17 C16 P3 Rh1 -72.67(18) . . . . ?
C23 C22 P3 C16 -136.46(18) . . . . ?
C27 C22 P3 C16 40.3(2) . . . . ?
C23 C22 P3 C28 116.53(18) . . . . ?
C27 C22 P3 C28 -66.7(2) . . . . ?
C23 C22 P3 Rh1 -3.5(2) . . . . ?
C27 C22 P3 Rh1 173.29(15) . . . . ?
C33 C28 P3 C16 -96.2(2) . . . . ?
C29 C28 P3 C16 84.77(19) . . . . ?
C33 C28 P3 C22 8.3(2) . . . . ?
C29 C28 P3 C22 -170.73(18) . . . . ?
C33 C28 P3 Rh1 131.55(18) . . . . ?
C29 C28 P3 Rh1 -47.46(19) . . . . ?
P2 Rh1 P3 C16 3.81(9) . . . . ?
P1 Rh1 P3 C16 -139.4(3) . . . . ?
Cl1 Rh1 P3 C16 -175.69(9) . . . . ?
P2 Rh1 P3 C22 -116.76(8) . . . . ?
P1 Rh1 P3 C22 100.0(3) . . . . ?
Cl1 Rh1 P3 C22 63.73(8) . . . . ?
P2 Rh1 P3 C28 124.39(7) . . . . ?
P1 Rh1 P3 C28 -18.8(3) . . . . ?
Cl1 Rh1 P3 C28 -55.11(7) . . . . ?
 
_diffrn_measured_fraction_theta_max    0.980
_diffrn_reflns_theta_full              28.24
_diffrn_measured_fraction_theta_full   0.980
_refine_diff_density_max    0.549
_refine_diff_density_min   -0.391
_refine_diff_density_rms    0.077
